# Supplementary material
Source: PubMed Central journal article supplement (PMC6683712)
Supplement: ASN.2018101016SupplementaryData.pdf [file ASN.2018101016SupplementaryData.pdf]

## Supplemental Figure References

Supplemental Figure 1: Biochemical Parameters in Diabetic and Non-Diabetic Patients. Mean values of hemoglobin (diabetic, panel A; non-diabetic, panel F), transferrin saturation (diabetic, panel B; non-diabetic, panel G), median serum ferritin (diabetic, panel C; non-diabetic, panel H), mean values of serum phosphate (diabetic, panel D; non-diabetic, panel I), and median intact fibroblast growth factor 23 (diabetic panel E; non-diabetic, panel J).

Supplemental Figure 2: Kaplan-Meier Survival Function Curve for time to the composite endpoint of Death, Dialysis or Transplant in diabetic patients (panel A) and non-diabetic patients (panel B).

### A) Hemoglobin

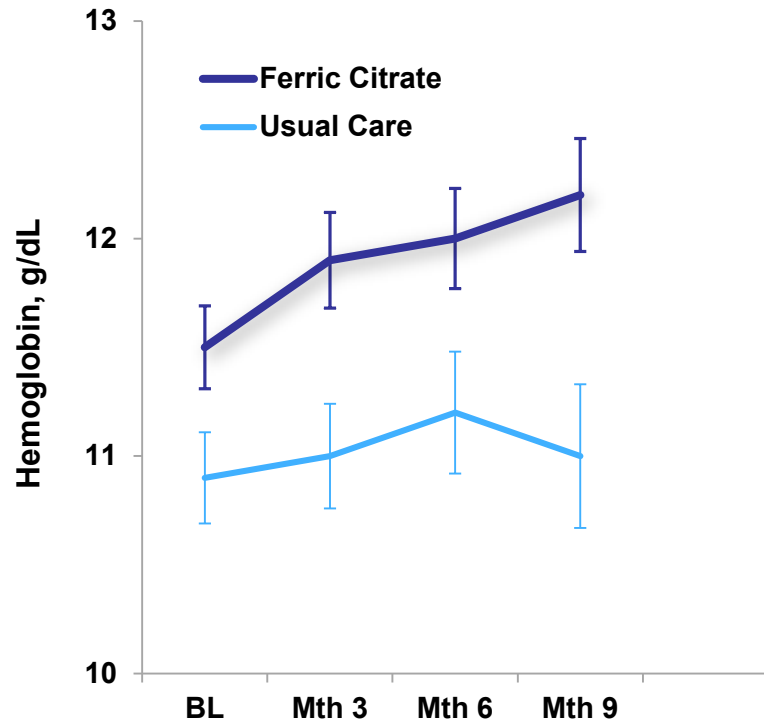

|                |    |    |    |    |
|----------------|----|----|----|----|
| Ferric Citrate | 63 | 55 | 50 | 40 |
| Usual Care     | 51 | 40 | 27 | 22 |

### B) TSAT

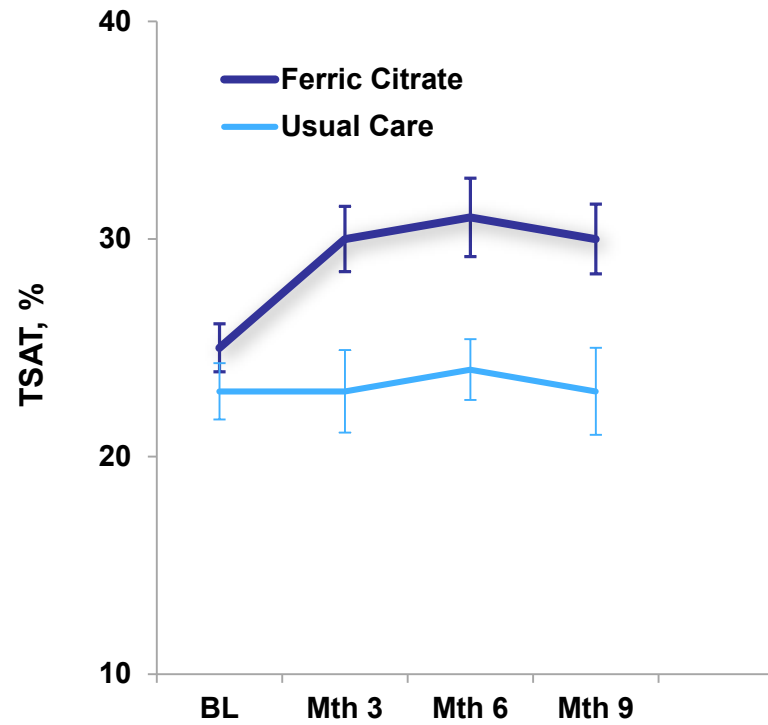

|                |    |    |    |    |
|----------------|----|----|----|----|
| Ferric Citrate | 63 | 55 | 50 | 41 |
| Usual Care     | 51 | 40 | 27 | 22 |

### C) Ferritin

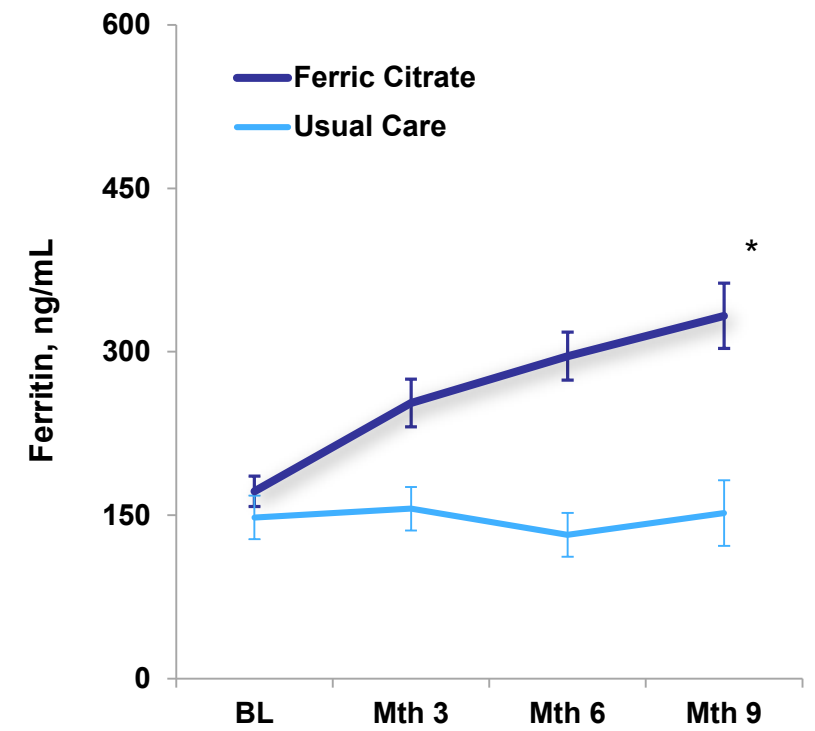

|                |    |    |    |    |
|----------------|----|----|----|----|
| Ferric Citrate | 63 | 55 | 50 | 41 |
| Usual Care     | 51 | 39 | 27 | 22 |

### D) Phosphate

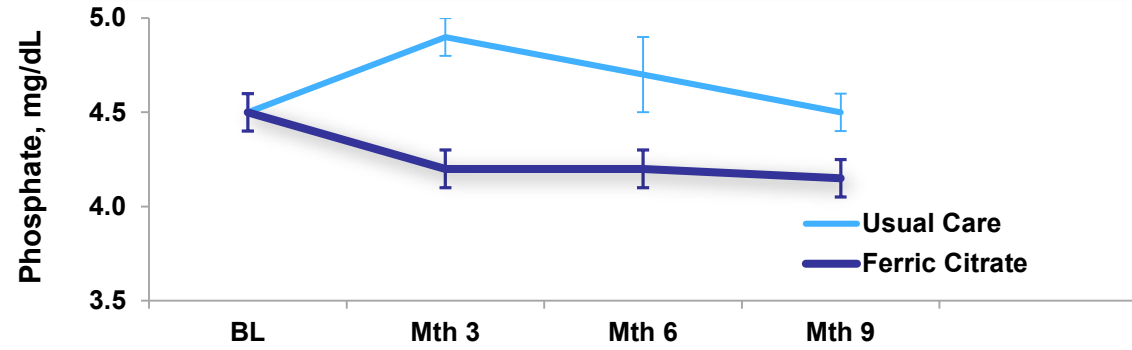

|                |    |    |    |    |
|----------------|----|----|----|----|
| Ferric Citrate | 63 | 55 | 50 | 41 |
| Usual Care     | 51 | 40 | 27 | 22 |

### E) Intact FGF23

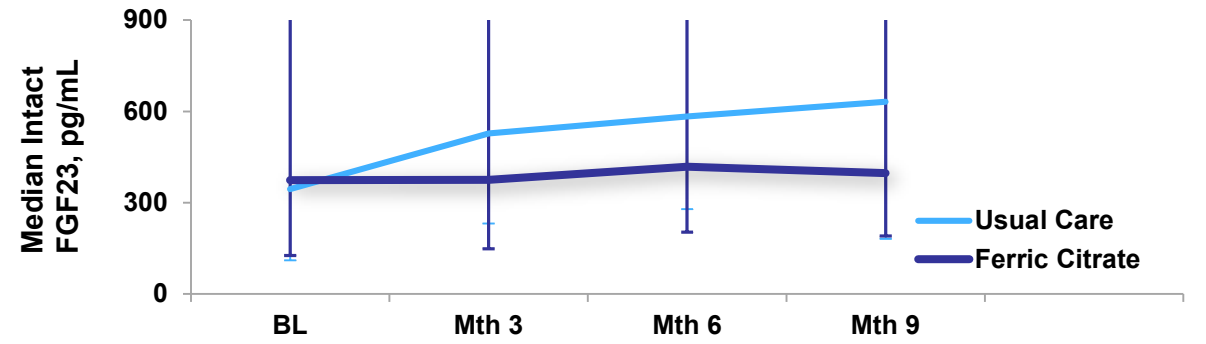

|                |    |    |    |    |
|----------------|----|----|----|----|
| Ferric Citrate | 63 | 55 | 49 | 41 |
| Usual Care     | 51 | 39 | 27 | 21 |

### F) Hemoglobin

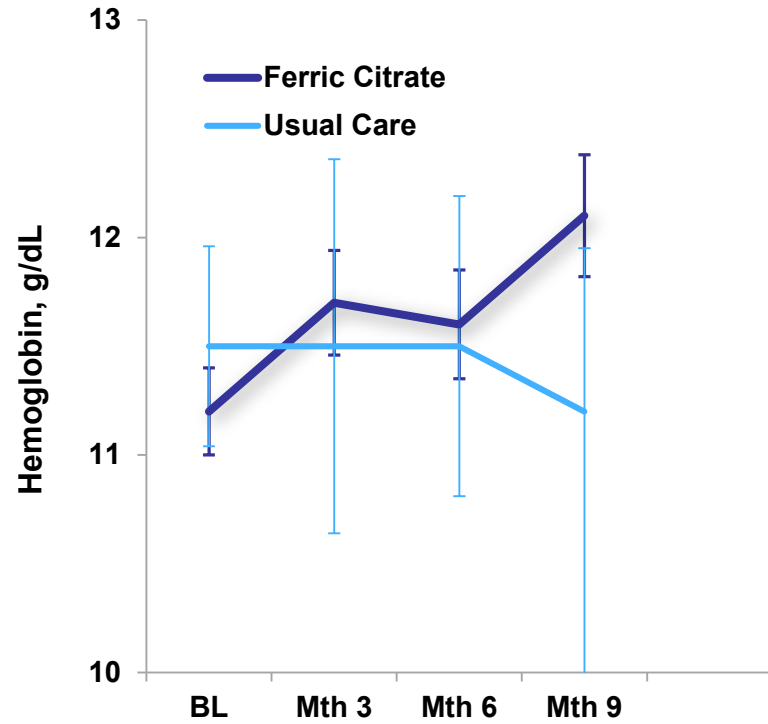

|                |    |    |    |    |
|----------------|----|----|----|----|
| Ferric Citrate | 70 | 60 | 42 | 35 |
| Usual Care     | 15 | 7  | 7  | 7  |

### G) TSAT

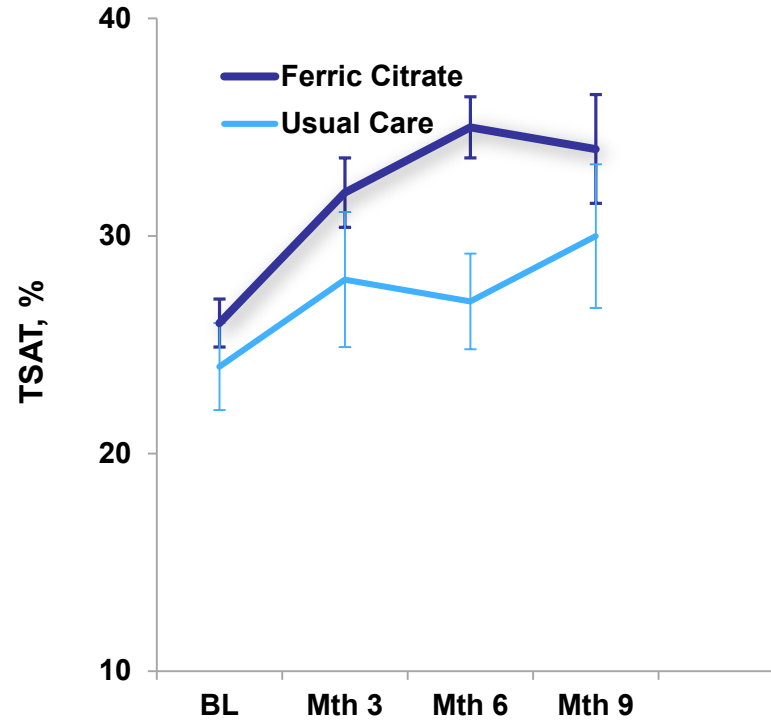

|                |    |    |    |    |
|----------------|----|----|----|----|
| Ferric Citrate | 70 | 60 | 42 | 35 |
| Usual Care     | 15 | 7  | 7  | 7  |

### H) Ferritin

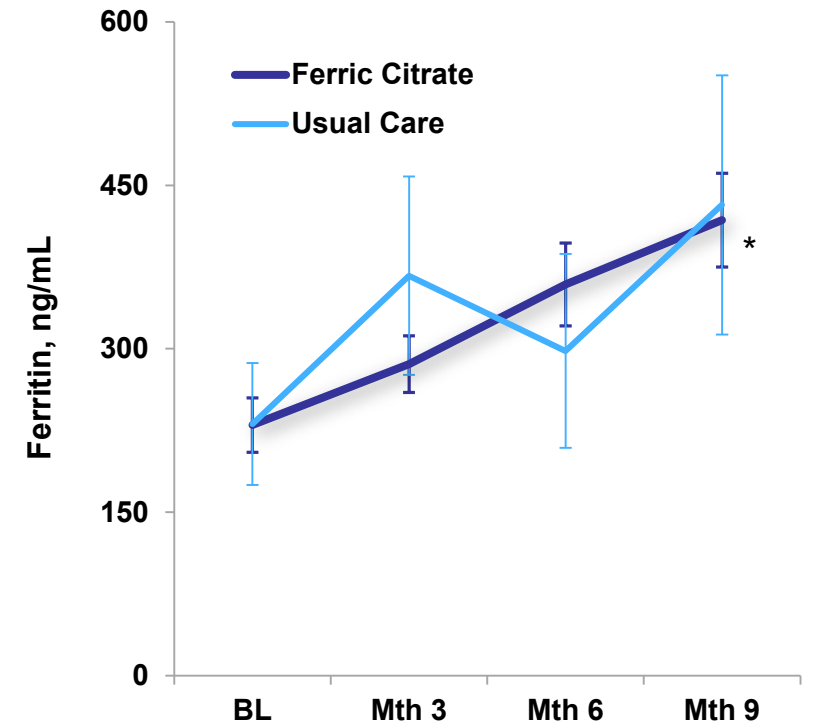

|                |    |    |    |    |
|----------------|----|----|----|----|
| Ferric Citrate | 70 | 60 | 42 | 34 |
| Usual Care     | 15 | 7  | 7  | 7  |

### I) Phosphate

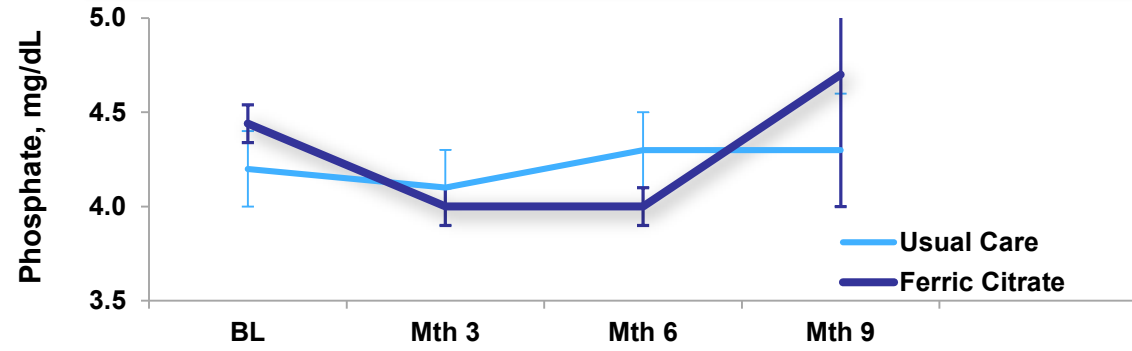

|                |    |    |    |    |
|----------------|----|----|----|----|
| Ferric Citrate | 70 | 60 | 42 | 35 |
| Usual Care     | 15 | 7  | 7  | 7  |

### J) Intact FGF23

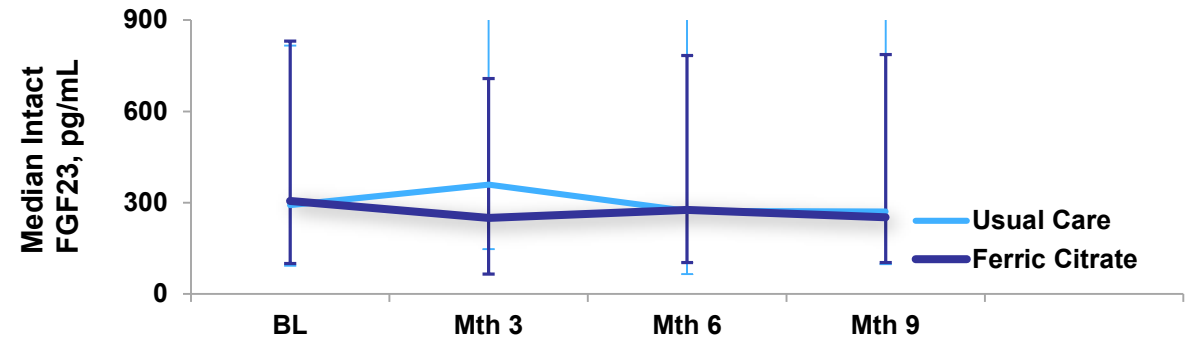

|                |    |    |    |    |
|----------------|----|----|----|----|
| Ferric Citrate | 70 | 60 | 42 | 34 |
| Usual Care     | 15 | 7  | 7  | 7  |

**Panel A**

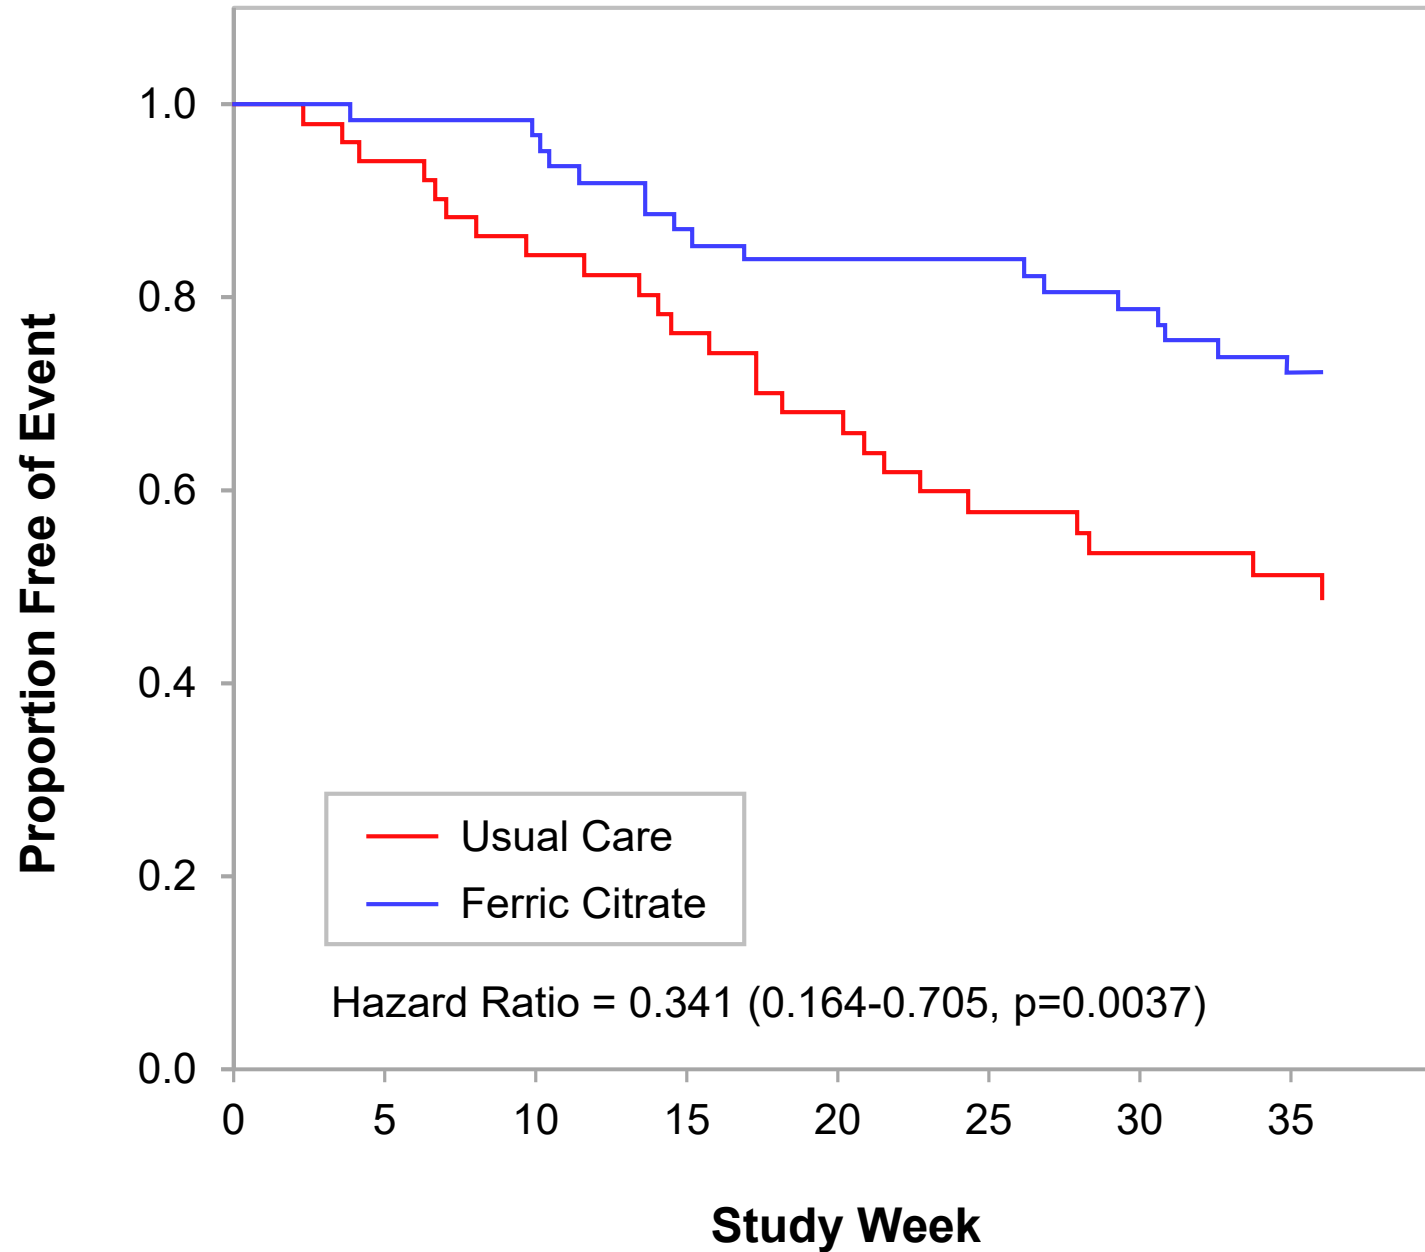

**Panel B**

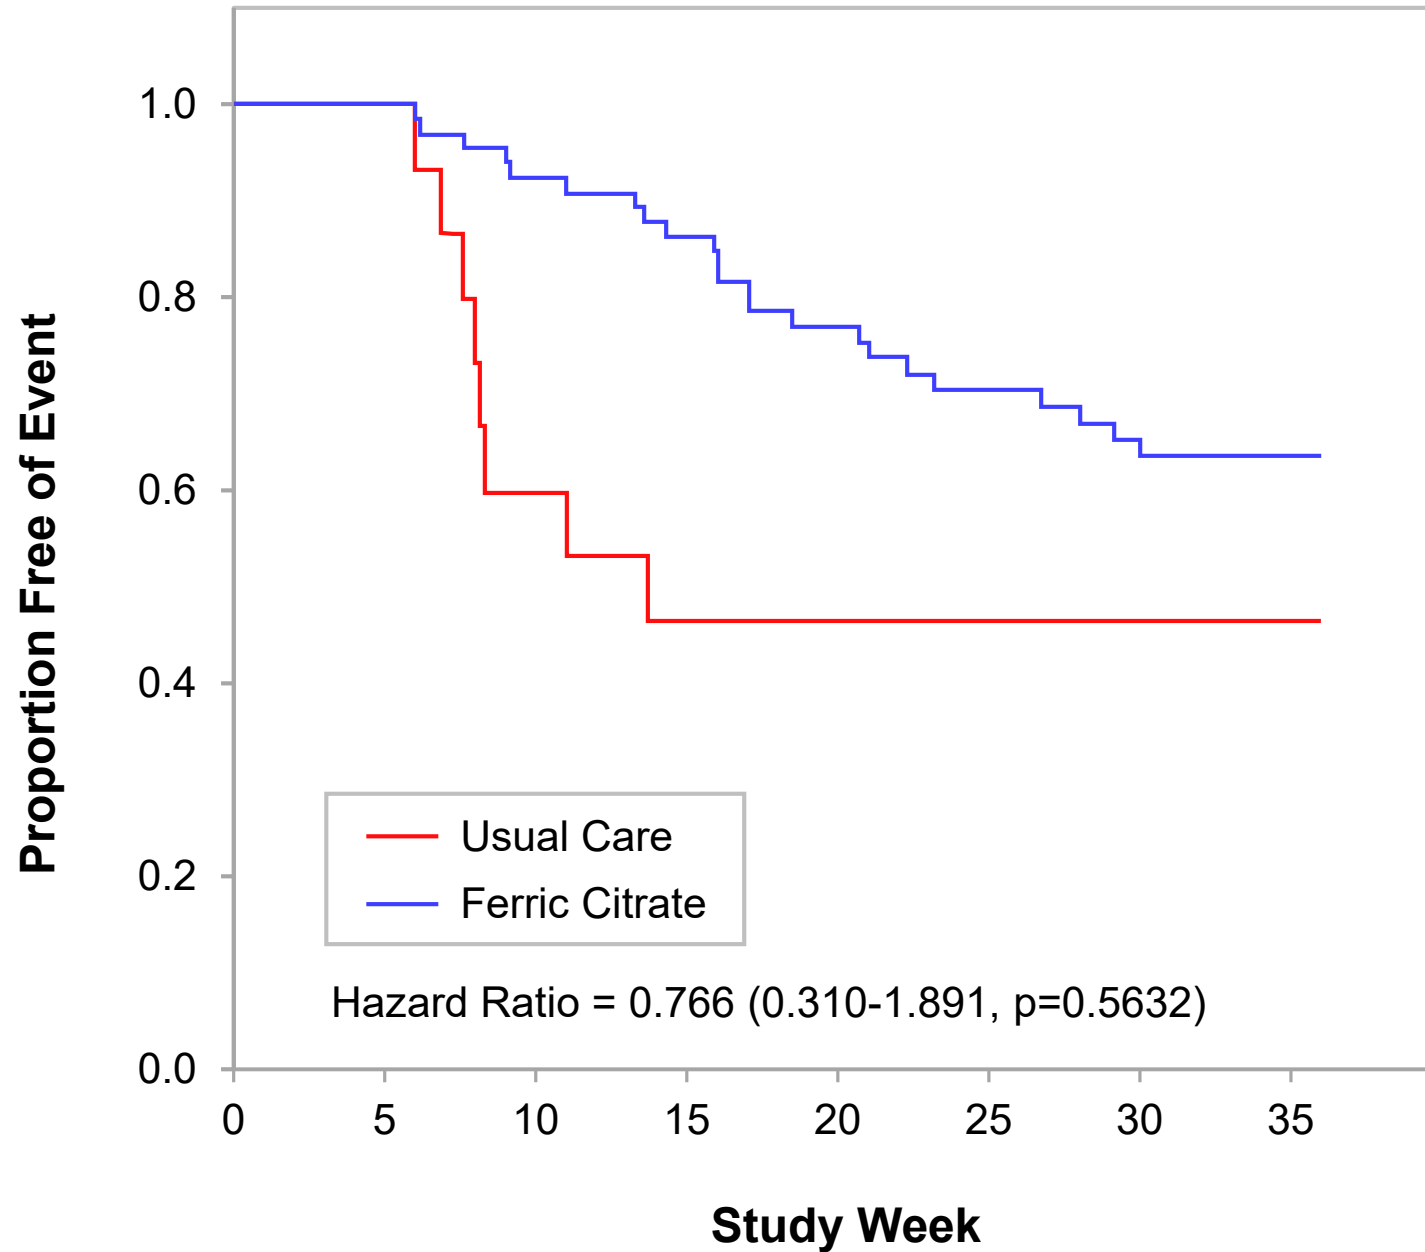

| Ferritin (ng/mL, median (IQR)) |    |               |     |                |
|--------------------------------|----|---------------|-----|----------------|
|                                | n= | UC            | n=  | FC             |
| Baseline                       | 66 | 106 (63,214)  | 133 | 165 (81, 253)  |
| Week 4                         | 6  | 177 (62, 233) | 12  | 248 (194, 328) |
| Week 8                         | 1  | 88 (88, 88)   | 1   | 114 (114,114)  |
| Week 12                        | 46 | 133 (71, 287) | 115 | 230 (135, 337) |
| Week 16                        | 0  |               | 2   | 258 (127, 388) |
| Week 20                        | 0  |               | 3   | 387 (45, 528)  |
| Week 24                        | 34 | 104 (67, 235) | 92  | 274 (168, 447) |
| Week 28                        | 0  |               | 2   | 388 (269, 506) |
| Week 32                        | 1  | 80 (80, 80)   | 2   | 379 (347, 411) |
| Week 36                        | 29 | 123 (78, 318) | 75  | 322 (204, 500) |

| IRON (mcg/dL, mean (SD)) |    |             |     |             |
|--------------------------|----|-------------|-----|-------------|
|                          | n= | UC          | n=  | FC          |
| Baseline                 | 11 | 66.7 (24.4) | 22  | 70.7 (20.2) |
| Week 4                   | 56 | 64.8 (25.0) | 121 | 75.4 (26.7) |
| Week 8                   | 53 | 61.4 (22.5) | 124 | 75.8 (27.2) |
| Week 12                  | 47 | 69.3 (37.5) | 115 | 80.3 (30.4) |
| Week 16                  | 42 | 61.7 (22.0) | 104 | 82.2 (29.6) |
| Week 20                  | 37 | 69.8 (21.1) | 97  | 77.5 (24.6) |
| Week 24                  | 34 | 78.5 (45.6) | 92  | 81.9 (24.5) |
| Week 28                  | 31 | 64.1 (18.6) | 85  | 80.0 (27.6) |
| Week 32                  | 30 | 70.4 (25.8) | 77  | 90.0 (72.3) |
| Week 36                  | 28 | 67.8 (23.2) | 75  | 81.3 (29.9) |



| Hematocrit (% , mean (SD)) |    |            |     |            |
|----------------------------|----|------------|-----|------------|
|                            | n= | UC         | n=  | FC         |
| Baseline                   | 66 | 33.5 (4.8) | 133 | 34.3 (4.8) |
| Week 4                     | 62 | 33.4 (4.7) | 130 | 34.6 (4.9) |
| Week 8                     | 53 | 33.7 (4.8) | 124 | 35.0 (5.0) |
| Week 12                    | 47 | 33.6 (5.1) | 115 | 35.6 (5.1) |
| Week 16                    | 42 | 33.2 (4.4) | 105 | 35.6 (5.3) |
| Week 20                    | 37 | 34.0 (4.3) | 97  | 35.3 (4.9) |
| Week 24                    | 34 | 34.2 (4.9) | 92  | 35.4 (5.6) |
| Week 28                    | 32 | 33.6 (4.8) | 86  | 35.7 (5.0) |
| Week 32                    | 30 | 33.2 (4.5) | 79  | 36.6 (5.9) |
| Week 36                    | 29 | 33.2 (5.0) | 75  | 36.5 (5.0) |

| WBC (cells/mcL, mean (SD)) |    |           |     |           |
|----------------------------|----|-----------|-----|-----------|
|                            | n= | UC        | n=  | FC        |
| Baseline                   | 66 | 7.1 (1.8) | 133 | 6.8 (2.0) |
| Week 4                     | 62 | 7.1 (2.3) | 130 | 6.8 (1.9) |
| Week 8                     | 53 | 7.0 (1.9) | 124 | 6.7 (1.9) |
| Week 12                    | 47 | 7.2 (2.0) | 115 | 6.9 (1.9) |
| Week 16                    | 42 | 6.9 (1.7) | 105 | 6.9 (2.3) |
| Week 20                    | 37 | 7.0 (2.0) | 97  | 6.9 (2.2) |
| Week 24                    | 34 | 6.9 (2.0) | 92  | 6.8 (1.9) |
| Week 28                    | 32 | 7.0 (1.8) | 86  | 6.9 (1.9) |
| Week 32                    | 30 | 6.9 (2.5) | 79  | 7.0 (2.0) |
| Week 36                    | 29 | 7.0 (2.3) | 75  | 6.7 (1.8) |

| TSAT (% , mean (SD)) |    |             |     |             |
|----------------------|----|-------------|-----|-------------|
|                      | n= | UC          | n=  | FC          |
| Baseline             | 66 | 22.8 (8.8)  | 133 | 25.3 (9.1)  |
| Week 4               | 56 | 23.5 (9.9)  | 121 | 28.4 (10.0) |
| Week 8               | 53 | 21.7 (7.6)  | 124 | 29.3 (10.6) |
| Week 12              | 47 | 24.1 (11.8) | 115 | 31 (11.9)   |
| Week 16              | 42 | 21.8 (7.5)  | 104 | 32.0 (11.3) |
| Week 20              | 37 | 23.9 (7.7)  | 97  | 30.4 (9.4)  |
| Week 24              | 34 | 24.5 (6.9)  | 92  | 32.6 (11.3) |
| Week 28              | 31 | 22.6 (5.9)  | 86  | 31.7 (12.3) |
| Week 32              | 30 | 25.9 (9.0)  | 78  | 32.2 (11.6) |
| Week 36              | 29 | 24.9 (9.5)  | 76  | 31.9 (12.5) |

| Platelets (cells/mcL, mean (SD)) |    |              |     |              |
|----------------------------------|----|--------------|-----|--------------|
|                                  | n= | UC           | n=  | FC           |
| Baseline                         | 66 | 239.9 (75.2) | 133 | 222.2 (75.9) |
| Week 4                           | 61 | 240.5 (77.7) | 130 | 221.2 (72.4) |
| Week 8                           | 52 | 235.2 (63.3) | 124 | 215.9 (71.6) |
| Week 12                          | 47 | 250.0 (67.9) | 115 | 215.2 (68.9) |
| Week 16                          | 42 | 227.2 (59.2) | 105 | 213.0 (74.3) |
| Week 20                          | 37 | 232.6 (58.4) | 97  | 208.2 (67.8) |
| Week 24                          | 34 | 229.2 (66.6) | 92  | 208.2 (64.4) |
| Week 28                          | 32 | 225.5 (59.0) | 86  | 216.3 (71.8) |
| Week 32                          | 30 | 227.9 (61.6) | 79  | 205.2 (66.7) |
| Week 36                          | 29 | 234.8 (76.1) | 75  | 204.8 (64.5) |

| Phosphorus (mg/dL, mean (SD)) |    |           |     |           |
|-------------------------------|----|-----------|-----|-----------|
|                               | n= | UC        | n=  | FC        |
| Baseline                      | 66 | 4.4 (0.7) | 133 | 4.5 (0.9) |
| Week 4                        | 62 | 4.7 (0.8) | 130 | 4.0 (1.0) |
| Week 8                        | 53 | 4.5 (0.9) | 124 | 4.1 (0.8) |
| Week 12                       | 47 | 4.7 (0.9) | 115 | 4.1 (0.8) |
| Week 16                       | 42 | 4.6 (0.9) | 105 | 4.0 (0.8) |
| Week 20                       | 37 | 4.4 (0.7) | 97  | 4.2 (0.9) |
| Week 24                       | 34 | 4.7 (0.7) | 92  | 4.1 (0.8) |
| Week 28                       | 32 | 4.7 (0.9) | 85  | 4.1 (0.9) |
| Week 32                       | 30 | 4.7 (1.0) | 79  | 4.1 (0.8) |
| Week 36                       | 29 | 4.5 (0.7) | 76  | 4.4 (3.0) |

| Hemoglobin, (g/dL, mean (SD)) |    |            |     |            |
|-------------------------------|----|------------|-----|------------|
|                               | n= | UC         | n=  | FC         |
| Baseline                      | 66 | 11.0 (1.6) | 133 | 11.3 (1.6) |
| Week 4                        | 62 | 11.1 (1.5) | 130 | 11.4 (1.6) |
| Week 8                        | 53 | 11.1 (1.6) | 124 | 11.6 (1.6) |
| Week 12                       | 47 | 11.1 (1.6) | 115 | 11.8 (1.7) |
| Week 16                       | 42 | 10.9 (1.4) | 105 | 11.8 (1.7) |
| Week 20                       | 37 | 11.1 (1.4) | 97  | 11.7 (1.6) |
| Week 24                       | 34 | 11.3 (1.5) | 92  | 11.8 (1.6) |
| Week 28                       | 32 | 11.2 (1.5) | 86  | 11.8 (1.6) |
| Week 32                       | 30 | 11.1 (1.5) | 79  | 12.0 (1.6) |
| Week 36                       | 29 | 11.0 (1.6) | 75  | 12.1 (1.6) |

| BUN (mg/dL, mean (SD)) |    |             |     |             |
|------------------------|----|-------------|-----|-------------|
|                        | n= | UC          | n=  | FC          |
| Baseline               | 66 | 61.2 (16.5) | 133 | 59.1 (18.1) |
| Week 4                 | 62 | 61.2 (18.2) | 130 | 57.0 (19.2) |
| Week 8                 | 53 | 59.5 (15.7) | 123 | 58.4 (18.8) |
| Week 12                | 47 | 61.1 (16.1) | 115 | 58.4 (19.3) |
| Week 16                | 42 | 59.4 (11.3) | 104 | 58.2 (17.2) |
| Week 20                | 37 | 57.6 (12.7) | 97  | 59.8 (17.2) |
| Week 24                | 34 | 60.7 (14.7) | 92  | 60.0 (17.3) |
| Week 28                | 32 | 64.3 (15.4) | 86  | 59.7 (17.2) |
| Week 32                | 30 | 64.7 (13.7) | 79  | 60.6 (20.0) |
| Week 36                | 29 | 62.2 (15.4) | 76  | 57.6 (16.4) |

| Creatinine (mg/dL, mean (SD)) |    |           |     |           |
|-------------------------------|----|-----------|-----|-----------|
|                               | n= | UC        | n=  | FC        |
| Baseline                      | 66 | 4.2 (1.5) | 133 | 4.2 (1.4) |
| Week 4                        | 62 | 4.3 (1.4) | 130 | 4.3 (1.7) |
| Week 8                        | 53 | 4.2 (1.6) | 123 | 4.4 (1.9) |
| Week 12                       | 47 | 4.3 (1.6) | 115 | 4.4 (1.8) |
| Week 16                       | 42 | 4.1 (1.5) | 104 | 4.3 (1.5) |
| Week 20                       | 37 | 3.9 (1.1) | 97  | 4.3 (1.3) |
| Week 24                       | 34 | 4.1 (1.2) | 92  | 4.3 (1.4) |
| Week 28                       | 32 | 4.4 (1.5) | 86  | 4.3 (1.5) |
| Week 32                       | 30 | 4.3 (1.4) | 79  | 4.2 (1.3) |
| Week 36                       | 29 | 4.1 (1.2) | 76  | 4.2 (1.4) |

| Glucose (mg/dL, mean (SD)) |    |              |     |              |
|----------------------------|----|--------------|-----|--------------|
|                            | n= | UC           | n=  | FC           |
| Baseline                   | 66 | 155.8 (65.5) | 133 | 129.0 (58.6) |
| Week 4                     | 62 | 148.8 (70.1) | 130 | 134.5 (76.1) |
| Week 8                     | 53 | 153.3 (84.8) | 123 | 134.6 (65.6) |
| Week 12                    | 47 | 146.1 (68.6) | 115 | 140.3 (90.8) |
| Week 16                    | 42 | 153.9 (74.7) | 104 | 138.8 (63.9) |
| Week 20                    | 37 | 156.7 (72.8) | 97  | 137.4 (65.3) |
| Week 24                    | 34 | 148.8 (78.4) | 92  | 136.2 (69.4) |
| Week 28                    | 32 | 153.1 (82.2) | 86  | 144.0 (69.9) |
| Week 32                    | 30 | 150.2 (66.3) | 79  | 141.8 (70.5) |
| Week 36                    | 29 | 146.3 (76.8) | 76  | 138.0 (66.3) |

| Sodium (mmol/L, mean (SD)) |    |             |     |             |
|----------------------------|----|-------------|-----|-------------|
|                            | n= | UC          | n=  | FC          |
| Baseline                   | 66 | 138.4 (2.8) | 133 | 138.7 (2.9) |
| Week 4                     | 62 | 138.4 (3.1) | 130 | 138.7 (3.2) |
| Week 8                     | 53 | 138.8 (2.9) | 123 | 138.5 (3.2) |
| Week 12                    | 47 | 138.7 (3.0) | 115 | 138.3 (3.7) |
| Week 16                    | 42 | 138.0 (2.6) | 104 | 138.6 (2.9) |
| Week 20                    | 37 | 138.8 (3.8) | 97  | 138.6 (2.9) |
| Week 24                    | 34 | 137.9 (2.6) | 92  | 138.6 (3.1) |
| Week 28                    | 32 | 137.5 (2.7) | 86  | 138.7 (2.8) |
| Week 32                    | 30 | 137.2 (2.6) | 79  | 138.9 (2.8) |
| Week 36                    | 29 | 137.3 (3.6) | 76  | 138.9 (2.8) |

| Potassium (mmol/L, mean (SD)) |    |           |     |           |
|-------------------------------|----|-----------|-----|-----------|
|                               | n= | UC        | n=  | FC        |
| Baseline                      | 66 | 4.3 (0.6) | 133 | 4.5 (0.5) |
| Week 4                        | 62 | 4.3 (0.5) | 130 | 4.5 (0.5) |
| Week 8                        | 53 | 4.4 (0.6) | 123 | 4.5 (0.4) |
| Week 12                       | 47 | 4.4 (0.5) | 115 | 4.5 (0.4) |
| Week 16                       | 42 | 4.4 (0.5) | 104 | 4.5 (0.5) |
| Week 20                       | 37 | 4.4 (0.4) | 97  | 4.5 (0.5) |
| Week 24                       | 34 | 4.4 (0.4) | 92  | 4.5 (0.5) |
| Week 28                       | 32 | 4.6 (0.5) | 86  | 4.5 (0.5) |
| Week 32                       | 30 | 4.5 (0.4) | 79  | 4.4 (0.4) |
| Week 36                       | 29 | 4.5 (0.5) | 76  | 4.4 (0.4) |

| GFR (mL/min/1.73m <sup>2</sup> , mean (SD)) |    |            |     |            |
|---------------------------------------------|----|------------|-----|------------|
|                                             | n= | UC         | n=  | FC         |
| Baseline                                    | 66 | 14.5 (4.1) | 133 | 14.2 (3.9) |
| Week 4                                      | 62 | 14.0 (3.7) | 130 | 14.2 (4.3) |
| Week 8                                      | 53 | 14.6 (4.2) | 123 | 13.9 (4.4) |
| Week 12                                     | 46 | 14.2 (4.2) | 115 | 13.9 (4.2) |
| Week 16                                     | 42 | 14.5 (4.0) | 104 | 14.0 (4.4) |
| Week 20                                     | 37 | 15.0 (3.8) | 97  | 13.7 (4.2) |
| Week 24                                     | 34 | 14.0 (3.7) | 92  | 13.8 (4.0) |
| Week 28                                     | 32 | 13.0 (3.5) | 86  | 13.8 (4.2) |
| Week 32                                     | 30 | 13.4 (3.8) | 79  | 14.2 (4.2) |
| Week 36                                     | 29 | 14.1 (4.7) | 76  | 14.2 (4.1) |

| Bicarbonate (mmol/L, mean (SD)) |    |            |     |            |
|---------------------------------|----|------------|-----|------------|
|                                 | n= | UC         | n=  | FC         |
| Baseline                        | 66 | 21.2 (3.5) | 133 | 20.4 (3.4) |
| Week 4                          | 62 | 21.3 (3.8) | 130 | 21.3 (3.2) |
| Week 8                          | 53 | 21.4 (3.4) | 122 | 21.2 (3.1) |
| Week 12                         | 46 | 21.2 (3.3) | 115 | 21.0 (3.1) |
| Week 16                         | 42 | 21.6 (2.9) | 104 | 21.1 (3.4) |
| Week 20                         | 37 | 21.2 (2.9) | 97  | 21.0 (3.2) |
| Week 24                         | 34 | 21.6 (2.8) | 92  | 21.5 (3.3) |
| Week 28                         | 32 | 21.4 (2.7) | 86  | 21.3 (3.2) |
| Week 32                         | 30 | 21.2 (3.0) | 78  | 21.9 (3.3) |
| Week 36                         | 29 | 21.3 (3.0) | 76  | 22.0 (3.3) |

| Calcium (mg/dL, mean (SD)) |    |           |     |           |
|----------------------------|----|-----------|-----|-----------|
|                            | n= | UC        | n=  | FC        |
| Baseline                   | 66 | 8.9 (0.7) | 133 | 9.0( 0.6) |
| Week 4                     | 62 | 8.9 (0.7) | 130 | 9.0 (0.6) |
| Week 8                     | 53 | 8.9 (0.6) | 123 | 9.1 (0.6) |
| Week 12                    | 47 | 8.9 (0.8) | 115 | 9.1 (0.6) |
| Week 16                    | 42 | 8.9 (0.8) | 104 | 9.0 (0.7) |
| Week 20                    | 37 | 9.1 (0.5) | 97  | 9.1 (0.7) |
| Week 24                    | 34 | 9.2 (0.5) | 92  | 9.1 (0.7) |
| Week 28                    | 32 | 9.2 (0.4) | 86  | 9.2 (0.8) |
| Week 32                    | 30 | 9.1 (0.5) | 79  | 9.1 (0.6) |
| Week 36                    | 29 | 9.1 (0.4) | 76  | 9.1 (0.7) |

| Chloride (mmol/L, mean (SD)) |    |             |     |             |
|------------------------------|----|-------------|-----|-------------|
|                              | n= | UC          | n=  | FC          |
| Baseline                     | 66 | 105.9 (4.0) | 133 | 107.1 (4.4) |
| Week 4                       | 62 | 105.5 (4.9) | 130 | 106.3 (4.0) |
| Week 8                       | 53 | 105.8 (4.5) | 123 | 106.5 (4.1) |
| Week 12                      | 47 | 105.9 (4.9) | 115 | 106.4 (4.3) |
| Week 16                      | 42 | 105.3 (4.2) | 104 | 106.5 (4.0) |
| Week 20                      | 37 | 105.6 (4.7) | 97  | 106.5 (4.1) |
| Week 24                      | 34 | 104.9 (3.7) | 92  | 106.0 (4.3) |
| Week 28                      | 32 | 105.1 (3.6) | 86  | 106.2 (3.9) |
| Week 32                      | 30 | 104.9 (4.5) | 79  | 106.5 (4.1) |
| Week 36                      | 29 | 104.9 (4.8) | 76  | 106.3 (3.8) |

| Albumin (g/dL, mean (SD)) |    |           |     |           |
|---------------------------|----|-----------|-----|-----------|
|                           | n= | UC        | n=  | FC        |
| Baseline                  | 66 | 3.7 (0.5) | 133 | 3.9 (0.4) |
| Week 4                    | 62 | 3.8 (0.5) | 129 | 3.9 (0.4) |
| Week 8                    | 53 | 3.8 (0.4) | 123 | 3.9 (0.4) |
| Week 12                   | 47 | 3.8 (0.5) | 115 | 3.9 (0.4) |
| Week 16                   | 42 | 3.9 (0.6) | 104 | 3.9 (0.4) |
| Week 20                   | 37 | 3.9 (0.4) | 97  | 3.9 (0.4) |
| Week 24                   | 34 | 3.9 (0.4) | 92  | 3.9 (0.4) |
| Week 28                   | 32 | 3.9 (0.4) | 86  | 3.9 (0.4) |
| Week 32                   | 30 | 3.9 (0.4) | 79  | 4.0 (0.3) |
| Week 36                   | 29 | 3.9 (0.4) | 76  | 4.0 (0.4) |

| Bilirubin (mg/dL, mean (SD)) |    |           |     |           |
|------------------------------|----|-----------|-----|-----------|
|                              | n= | UC        | n=  | FC        |
| Baseline                     | 66 | 0.5 (0.3) | 133 | 0.4 (0.2) |
| Week 4                       | 62 | 0.5 (0.2) | 129 | 0.5 (0.2) |
| Week 8                       | 53 | 0.5 (0.2) | 123 | 0.5 (0.2) |
| Week 12                      | 47 | 0.4 (0.1) | 115 | 0.5 (0.2) |
| Week 16                      | 42 | 0.5 (0.1) | 104 | 0.5 (0.2) |
| Week 20                      | 37 | 0.5 (0.2) | 97  | 0.5 (0.2) |
| Week 24                      | 34 | 0.5 (0.1) | 92  | 0.5 (0.2) |
| Week 28                      | 32 | 0.4 (0.1) | 86  | 0.5 (0.2) |
| Week 32                      | 30 | 0.5 (0.1) | 79  | 0.5 (0.2) |
| Week 36                      | 29 | 0.5 (0.2) | 76  | 0.5 (0.2) |

| Total Protein (g/dL, mean (SD)) |    |           |     |           |
|---------------------------------|----|-----------|-----|-----------|
|                                 | n= | UC        | n=  | FC        |
| Baseline                        | 66 | 6.5 (0.6) | 133 | 6.6 (0.5) |
| Week 4                          | 62 | 6.5 (0.7) | 130 | 6.5 (0.5) |
| Week 8                          | 53 | 6.6 (0.7) | 123 | 6.5 (0.5) |
| Week 12                         | 47 | 6.7 (0.6) | 115 | 6.6 (0.6) |
| Week 16                         | 42 | 6.6 (0.6) | 104 | 6.5 (0.5) |
| Week 20                         | 37 | 6.8 (0.6) | 97  | 6.5 (0.5) |
| Week 24                         | 34 | 6.9 (0.6) | 92  | 6.6 (0.5) |
| Week 28                         | 32 | 6.8 (0.6) | 86  | 6.5 (0.5) |
| Week 32                         | 30 | 6.8 (0.7) | 79  | 6.6 (0.5) |
| Week 36                         | 29 | 6.8 (0.5) | 76  | 6.6 (0.5) |

| AST (U/L, mean (SD)) |    |            |     |            |
|----------------------|----|------------|-----|------------|
|                      | n= | UC         | n=  | FC         |
| Baseline             | 66 | 18.3 (8.0) | 133 | 17.4 (7.3) |
| Week 4               | 62 | 17.7 (6.5) | 129 | 17.7 (9.5) |
| Week 8               | 53 | 18.2 (8.1) | 123 | 17.7 (8.2) |
| Week 12              | 47 | 17.9 (6.7) | 115 | 16.9 (5.9) |
| Week 16              | 42 | 18.0 (5.6) | 104 | 17.1 (6.4) |
| Week 20              | 37 | 18.2 (7.0) | 97  | 16.7 (6.7) |
| Week 24              | 34 | 19.4 (6.9) | 92  | 16.9 (5.6) |
| Week 28              | 32 | 18.1 (6.2) | 86  | 17.1 (5.8) |
| Week 32              | 30 | 18.4 (8.4) | 79  | 16.5 (5.3) |
| Week 36              | 29 | 17.0 (6.1) | 76  | 17.1 (6.0) |

| ALT (U/L, mean (SD)) |    |             |     |             |
|----------------------|----|-------------|-----|-------------|
|                      | n= | UC          | n=  | FC          |
| Baseline             | 66 | 17.5 (11.9) | 133 | 16.7 (9.9)  |
| Week 4               | 62 | 17.0 (11.1) | 129 | 16.8 (9.9)  |
| Week 8               | 53 | 17.7 (11.2) | 123 | 17.7 (12.3) |
| Week 12              | 47 | 16.2 (9.5)  | 115 | 16.0 (6.7)  |
| Week 16              | 42 | 16.3 (8.0)  | 104 | 17.0 (8.6)  |
| Week 20              | 37 | 16.1 (8.8)  | 97  | 15.9 (7.7)  |
| Week 24              | 34 | 17.6 (10.7) | 92  | 16.8 (8.8)  |
| Week 28              | 32 | 15.9 (9.1)  | 86  | 16.7 (7.2)  |
| Week 32              | 30 | 17.0 (11.2) | 79  | 17.0 (10.9) |
| Week 36              | 29 | 15.8 (11.8) | 76  | 17.2 (9.3)  |

| ALP (U/L, mean (SD)) |    |             |     |               |
|----------------------|----|-------------|-----|---------------|
|                      | n= | UC          | n=  | FC            |
| Baseline             | 66 | 87.9 (39.1) | 133 | 87.9 (60.2)   |
| Week 4               | 62 | 83.5 (36.1) | 129 | 90.6 (72.1)   |
| Week 8               | 53 | 85.5 (40.8) | 123 | 93.8 (98.3)   |
| Week 12              | 47 | 86.7 (37.3) | 115 | 103.6 (171.2) |
| Week 16              | 42 | 86.7 (39.4) | 104 | 98.5 (132.2)  |
| Week 20              | 37 | 78.0 (25.8) | 97  | 105.3 (156.6) |
| Week 24              | 34 | 79.6 (30.1) | 92  | 107.7 (181.4) |
| Week 28              | 32 | 78.8 (30.8) | 86  | 113.2 (213.1) |
| Week 32              | 30 | 81.8 (32.3) | 79  | 115.3 (220.7) |
| Week 36              | 29 | 84.1 (33.2) | 76  | 117.3 (215.7) |

| iFGF23 (pg/mL, median (IQR)) |    |                       |     |                      |
|------------------------------|----|-----------------------|-----|----------------------|
|                              | n= | UC                    | n=  | FC                   |
| Baseline                     | 64 | 330.7 (229.2, 704.4)  | 132 | 351.8 (221.9, 552.2) |
| Week 4                       | 0  |                       | 2   | 743.4 (312.7, 1174)  |
| Week 8                       | 1  | 1056 (1056, 1056)     | 0   |                      |
| Week 12                      | 46 | 490.7 (295.7, 859.1)  | 115 | 322.2 (202, 551.7)   |
| Week 16                      | 0  |                       | 2   | 4102 (596.1, 7607.4) |
| Week 20                      | 0  |                       | 3   | 329.6 (118.2, 677.8) |
| Week 24                      | 34 | 515.4 (270.4, 905.3)  | 91  | 321.3 (183.9, 684.7) |
| Week 28                      | 0  |                       | 1   | 297.3 (297.3, 297.3) |
| Week 32                      | 1  | 164 (164, 164)        | 3   | 466.9 (79.3, 3314.6) |
| Week 36                      | 28 | 558.4 (305.3, 1206.4) | 75  | 321.3 (177, 617.7)   |

| PTH (pg/mL, median (IQR)) |    |                   |     |                  |
|---------------------------|----|-------------------|-----|------------------|
|                           | n= | UC                | n=  | FC               |
| Baseline                  | 64 | 163.5 (102, 168)  | 130 | 164.5 (99,261.5) |
| Week 4                    | 0  |                   | 1   | 208 (208, 208)   |
| Week 8                    | 1  | 70 (70, 70)       | 1   | 301 (301, 301)   |
| Week 12                   | 46 | 145 (87,286)      | 114 | 141 (90, 229)    |
| Week 16                   | 0  |                   | 2   | 245.5 (109, 382) |
| Week 20                   | 0  |                   | 3   | 156 (91, 258)    |
| Week 24                   | 34 | 146.5 (117, 198)  | 91  | 155 (91, 218)    |
| Week 28                   | 0  |                   | 2   | 149.5 (125, 174) |
| Week 32                   | 1  | 132 (132, 132)    | 2   | 59 (39,79)       |
| Week 36                   | 28 | 144.5 (71.5, 184) | 73  | 173 (101, 244)   |



**Stratum 1: Active=1 Ferric Citrate**

**Product-Limit Survival Estimates**

| Week     | Survival | Failure | Error   | Failed | Left |
|----------|----------|---------|---------|--------|------|
| 0.0000   | 1.0000   | 0       | 0       | 0      | 133  |
| 3.0000*  |          |         |         | 0      | 132  |
| 3.1429*  |          |         |         | 0      | 131  |
| 3.8571   | 0.9924   | 0.00763 | 0.00760 | 1      | 130  |
| 4.1429*  |          |         |         | 1      | 129  |
| 5.4286*  |          |         |         | 1      | 128  |
| 6.0000   | 0.9846   | 0.0154  | 0.0108  | 2      | 127  |
| 6.1429   | 0.9769   | 0.0231  | 0.0132  | 3      | 126  |
| 7.2857*  |          |         |         | 3      | 125  |
| 7.5714   | 0.9690   | 0.0310  | 0.0152  | 4      | 124  |
| 9.0000   | 0.9612   | 0.0388  | 0.0170  | 5      | 123  |
| 9.1429   | 0.9534   | 0.0466  | 0.0186  | 6      | 122  |
| 9.8571   | 0.9456   | 0.0544  | 0.0200  | 7      | 121  |
| 10.1429  | 0.9378   | 0.0622  | 0.0213  | 8      | 120  |
| 10.4286  | 0.9300   | 0.0700  | 0.0225  | 9      | 119  |
| 11.0000  | 0.9222   | 0.0778  | 0.0236  | 10     | 118  |
| 11.4286  | 0.9143   | 0.0857  | 0.0247  | 11     | 117  |
| 13.2857  | 0.9065   | 0.0935  | 0.0257  | 12     | 116  |
| 13.5714  |          |         |         | 13     | 115  |
| 13.5714  |          |         |         | 14     | 114  |
| 13.5714  | 0.8831   | 0.1169  | 0.0284  | 15     | 113  |
| 14.2857  | 0.8753   | 0.1247  | 0.0292  | 16     | 112  |
| 14.5714  | 0.8675   | 0.1325  | 0.0299  | 17     | 111  |
| 15.1429  | 0.8596   | 0.1404  | 0.0307  | 18     | 110  |
| 15.7143* |          |         |         | 18     | 109  |
| 15.8571  | 0.8518   | 0.1482  | 0.0314  | 19     | 108  |
| 16.0000  |          |         |         | 20     | 107  |
| 16.0000  | 0.8360   | 0.1640  | 0.0327  | 21     | 106  |
| 16.2857* |          |         |         | 21     | 105  |
| 16.8571  | 0.8280   | 0.1720  | 0.0334  | 22     | 104  |
| 17.0000  |          |         |         | 23     | 103  |
| 17.0000  | 0.8121   | 0.1879  | 0.0346  | 24     | 102  |
| 17.1429* |          |         |         | 24     | 101  |
| 18.4286  | 0.8041   | 0.1959  | 0.0352  | 25     | 100  |
| 19.2857* |          |         |         | 25     | 99   |
| 20.0000* |          |         |         | 25     | 98   |

**Stratum 1: Active=1 Ferric Citrate****Product-Limit Survival Estimates**

| <b>Week</b> | <b>Survival</b> | <b>Failure</b> | <b>Error</b> | <b>Failed</b> | <b>Left</b> |
|-------------|-----------------|----------------|--------------|---------------|-------------|
| 20.7143     | 0.7958          | 0.2042         | 0.0357       | 26            | 97          |
| 21.0000     | 0.7876          | 0.2124         | 0.0363       | 27            | 96          |
| 21.4286*    |                 |                |              | 27            | 95          |
| 22.2857     | 0.7794          | 0.2206         | 0.0369       | 28            | 94          |
| 23.1429     | 0.7711          | 0.2289         | 0.0374       | 29            | 93          |
| 24.0000*    |                 |                |              | 29            | 92          |
| 24.0000*    |                 |                |              | 29            | 91          |
| 26.1429     | 0.7626          | 0.2374         | 0.0379       | 30            | 90          |
| 26.7143     | 0.7541          | 0.2459         | 0.0384       | 31            | 89          |
| 26.8571     | 0.7456          | 0.2544         | 0.0389       | 32            | 88          |
| 28.0000     | 0.7372          | 0.2628         | 0.0394       | 33            | 87          |
| 29.1429     | 0.7287          | 0.2713         | 0.0398       | 34            | 86          |
| 29.2857     | 0.7202          | 0.2798         | 0.0403       | 35            | 85          |
| 30.0000     | 0.7117          | 0.2883         | 0.0407       | 36            | 84          |
| 30.1429*    |                 |                |              | 36            | 83          |
| 30.5714     | 0.7032          | 0.2968         | 0.0411       | 37            | 82          |
| 30.8571     | 0.6946          | 0.3054         | 0.0415       | 38            | 81          |
| 31.7143*    |                 |                |              | 38            | 80          |
| 32.5714     | 0.6859          | 0.3141         | 0.0419       | 39            | 79          |
| 34.1429*    |                 |                |              | 39            | 78          |
| 34.8571     | 0.6771          | 0.3229         | 0.0422       | 40            | 77          |

**Stratum 2: SOC=0 = Standard of Care**

**Product-Limit Survival Estimates**

| <b>Week</b> | <b>Survival</b> | <b>Failure</b> | <b>Error</b> | <b>Failed</b> | <b>Left</b> |
|-------------|-----------------|----------------|--------------|---------------|-------------|
| 0.0000      | 1.0000          | 0              | 0            | 0             | 66          |
| 2.2857      | 0.9848          | 0.0152         | 0.0150       | 1             | 65          |
| 3.5714      | 0.9697          | 0.0303         | 0.0211       | 2             | 64          |
| 4.1429      | 0.9545          | 0.0455         | 0.0256       | 3             | 63          |
| 6.0000      | 0.9394          | 0.0606         | 0.0294       | 4             | 62          |
| 6.2857      | 0.9242          | 0.0758         | 0.0326       | 5             | 61          |
| 6.7143      | 0.9091          | 0.0909         | 0.0354       | 6             | 60          |
| 6.8571      | 0.8939          | 0.1061         | 0.0379       | 7             | 59          |
| 7.0000      | 0.8788          | 0.1212         | 0.0402       | 8             | 58          |
| 7.5714      | 0.8636          | 0.1364         | 0.0422       | 9             | 57          |
| 8.0000      |                 |                |              | 10            | 56          |
| 8.0000      | 0.8333          | 0.1667         | 0.0459       | 11            | 55          |
| 8.0000*     |                 |                |              | 11            | 54          |
| 8.1429      | 0.8179          | 0.1821         | 0.0475       | 12            | 53          |
| 8.2857      | 0.8025          | 0.1975         | 0.0491       | 13            | 52          |
| 9.7143      | 0.7870          | 0.2130         | 0.0505       | 14            | 51          |
| 11.0000     | 0.7716          | 0.2284         | 0.0518       | 15            | 50          |
| 11.5714     | 0.7562          | 0.2438         | 0.0530       | 16            | 49          |
| 13.4286     | 0.7407          | 0.2593         | 0.0542       | 17            | 48          |
| 13.7143     | 0.7253          | 0.2747         | 0.0552       | 18            | 47          |
| 14.0000     | 0.7099          | 0.2901         | 0.0561       | 19            | 46          |
| 14.4286     | 0.6944          | 0.3056         | 0.0570       | 20            | 45          |
| 15.7143     | 0.6790          | 0.3210         | 0.0578       | 21            | 44          |
| 16.4286*    |                 |                |              | 21            | 43          |
| 17.2857     |                 |                |              | 22            | 42          |
| 17.2857     | 0.6474          | 0.3526         | 0.0592       | 23            | 41          |
| 18.1429     | 0.6316          | 0.3684         | 0.0599       | 24            | 40          |
| 20.1429     | 0.6158          | 0.3842         | 0.0604       | 25            | 39          |
| 20.8571     | 0.6001          | 0.3999         | 0.0609       | 26            | 38          |
| 21.4286     | 0.5843          | 0.4157         | 0.0613       | 27            | 37          |
| 22.7143     | 0.5685          | 0.4315         | 0.0617       | 28            | 36          |
| 24.0000*    |                 |                |              | 28            | 35          |
| 24.2857     | 0.5522          | 0.4478         | 0.0620       | 29            | 34          |
| 27.8571     | 0.5360          | 0.4640         | 0.0623       | 30            | 33          |
| 28.0000*    |                 |                |              | 30            | 32          |
| 28.2857     | 0.5192          | 0.4808         | 0.0625       | 31            | 31          |

**Stratum 2: SOC=0 = Standard of Care****Product-Limit Survival Estimates**

| <b>Week</b>     | <b>Survival</b> | <b>Failure</b> | <b>Error</b>  | <b>Failed</b> | <b>Left</b> |
|-----------------|-----------------|----------------|---------------|---------------|-------------|
| <b>33.7143</b>  | <b>0.5025</b>   | <b>0.4975</b>  | <b>0.0627</b> | <b>32</b>     | <b>30</b>   |
| <b>34.4286*</b> |                 |                |               | <b>32</b>     | <b>29</b>   |
| <b>35.4286*</b> |                 |                |               | <b>32</b>     | <b>28</b>   |
| <b>35.8571*</b> |                 |                |               | <b>32</b>     | <b>27</b>   |
| <b>35.8571*</b> |                 |                |               | <b>32</b>     | <b>26</b>   |
| <b>35.8571*</b> |                 |                |               | <b>32</b>     | <b>25</b>   |
| <b>36.0000</b>  | <b>0.4824</b>   | <b>0.5176</b>  | <b>0.0633</b> | <b>33</b>     | <b>24</b>   |
